# Supplementary material for: Automated detection of feeding strikes by larval fish using continuous high-speed digital video: a novel method to extract quantitative data from fast, sparse kinematic events
Source: Oxford University Press journal article supplement (doi:10.1242/jeb.133751), 2016-01-01
Supplement: jeb133751supp.pdf [file jeb133751supp.pdf]

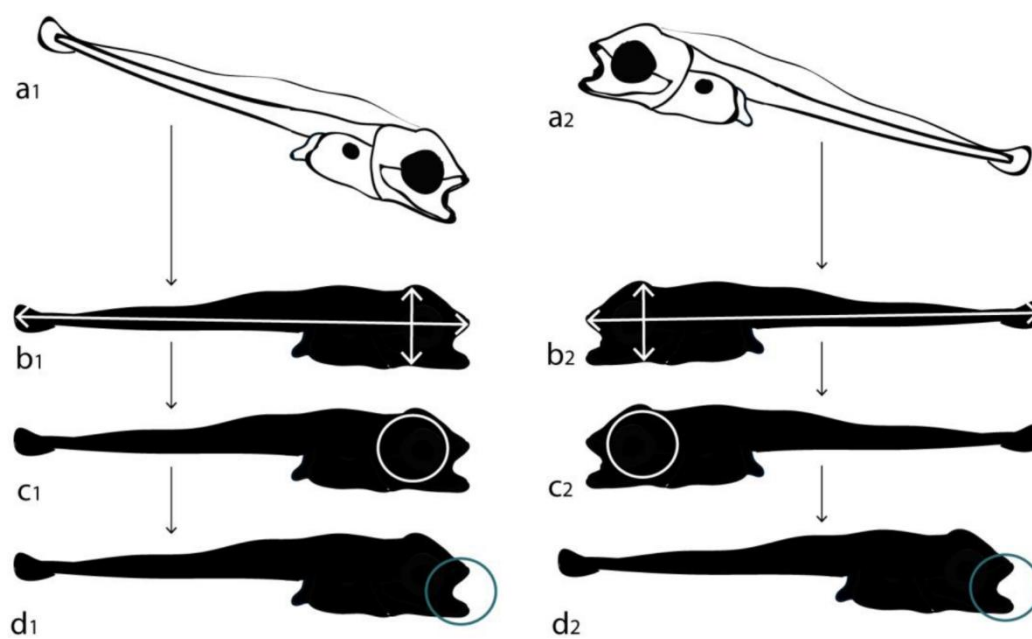

Fig S1: examples of pose normalizing and mouth detection of larval fish

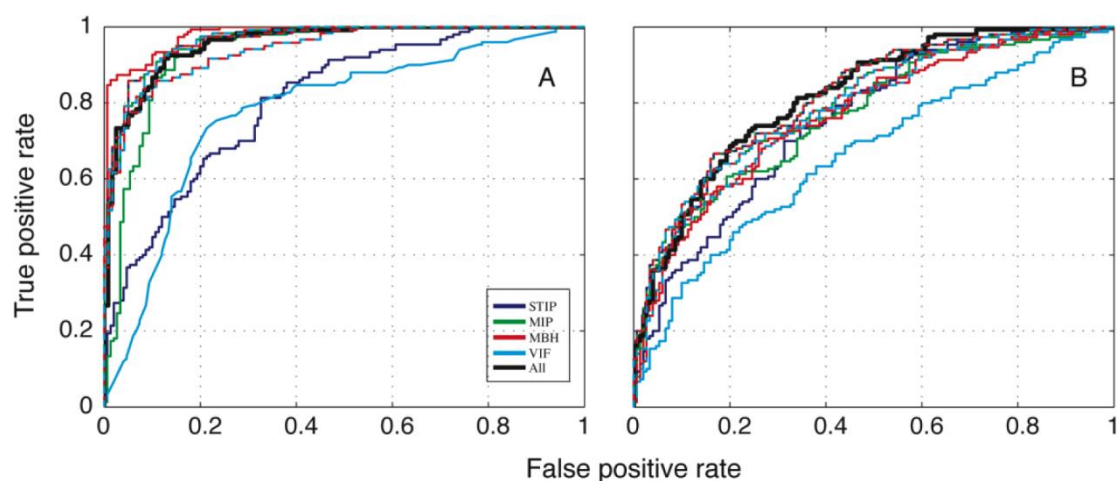

Fig S2: area under the curve (AUC) for *A. nigrofasciata* and *H. bimaculatus* (A) and *S. aurata* (B), for the different descriptors used in this study. Descriptor combinations (e.g. MBH+VIF) are marked by dashed, two color lines. The combination of all descriptors (STIP +MIP+MBH+VIF), which had the best performance is marked by a black thick line.

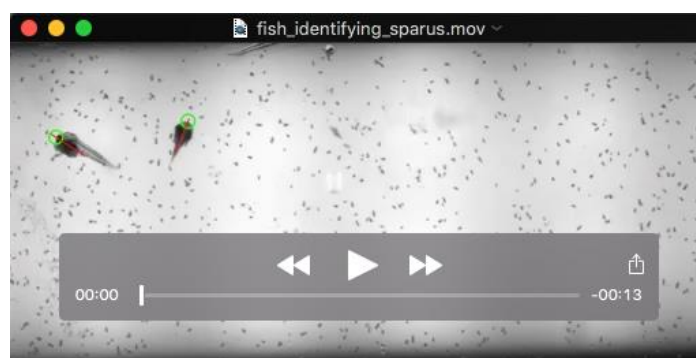

**Movie 1.** Video processing (first two stages of Fig. 2 in the main text) automatically identified fish and determined mouth location, indicated by green circles.
